1 **Main Manuscript for:**

2

3 **The Three Waves: Rethinking the Structure of the first Upper**  
4 **Paleolithic in Western Eurasia**

5 Ludovic Slimak<sup>1\*</sup>

6 <sup>1</sup>CNRS, UMR 5608, TRACES, Université de Toulouse Jean Jaurès, Maison de la Recherche, 5  
7 Allées Antonio Machado, 31058 Toulouse, Cedex 9, France.

8 \*Corresponding author = Ludovic Slimak.

9 **Email:** [slimak@univ-tlse2.fr](mailto:slimak@univ-tlse2.fr)

10 **Author Contributions:** L.S. designed research, performed research, analyzed data, and wrote  
11 the paper.

12 **Competing Interest Statement:** The authors declare no competing interests.

13 **Classification:** Biological Sciences/Anthropology, Social Sciences/Anthropology

14 **Keywords:** Grotte Mandrin, Ksar Akil, Neronian, Upper Paleolithic, Modern Human Expansion

15

16 **Abstract**

17 The Neronian is a lithic tradition recognized in the Middle Rhône Valley of Mediterranean France  
18 now directly linked to *Homo sapiens* and securely dated to 54,000 years ago (ka), pushing back  
19 the arrival of modern humans in Europe by 10 ka. This incursion of modern humans into  
20 Neandertal territory and the relationships evoked between the Neronian and the Levantine Initial  
21 Upper Paleolithic (IUP) question the validity of concepts that define the first *H. sapiens* migrations  
22 and the very nature of the first Upper Paleolithic in western Eurasia. Direct comparative analyses  
23 between lithic technology from Grotte Mandrin and East Mediterranean archeological sequences,  
24 especially Ksar Akil, suggest that the three key phases of the earliest Levantine Upper Paleolithic

25 have very precise technical and chronological counterparts in Western Europe, recognized from  
26 the Rhône Valley to Franco-Cantabria. These trans-Mediterranean technical connections suggest  
27 three distinct waves of *H. sapiens* expansion into Europe between 55-42 ka. These elements  
28 support an original thesis on the origin, structure, and evolution of the first moments of the Upper  
29 Paleolithic in Europe tracing parallel archaeological changes in the East Mediterranean region  
30 and Europe.

31

32

### 33 **Main Text**

#### 34 **Introduction**

35 The recent attribution of the Neronian industry to *Homo sapiens* at around the 54<sup>th</sup> millennium  
36 (56.8-51.7 ka cal. BP 95.4% prob.) at Grotte Mandrin in France not only indicates a 10,000-year  
37 push back of the arrival modern humans in Europe [1]; for the first time, concrete evidence of  
38 interactions between Neanderthals and modern populations are demonstrated in a specific  
39 territory. Five stratigraphic levels overlie the Neronian that have revealed Mousterian artifacts and  
40 Neanderthal teeth documenting the only occurrence of interstratification between modern and  
41 archaic hominins currently recognized in the world and a strict contemporaneity between these  
42 two populations. At Mandrin one year at most separates the preceding Neanderthal settlements  
43 and the arrival of modern humans (2-4), allowing us to approach the nature of potential  
44 interactions between these two populations. But the question of the first Upper Paleolithic (UP) is  
45 obviously not limited to only these exceptional archaeological records. This remarkable  
46 chronological and geographical overturning of our previously held theories about the first UP  
47 invites us to rethink the very structure of these human societies in Europe and, more broadly, in  
48 western Eurasia between 55 - 40 ka. This modern human incursion into Neanderthal territory and  
49 the relationships evoked between the Neronian and the Levantine Initial Upper Paleolithic – IUP-  
50 [1, 5, 6] question the validity of concepts that define the first *H. sapiens* migrations and the very  
51 nature of the first UP in western Eurasia. It is at this scale that the data from Mandrin invites

52 rethinking the structure of the first UP, a period for which the most salient traits have stayed  
53 unchanged since the first half of the 20<sup>th</sup> century.

54 This study discusses the structure of the connections that are now possible to establish  
55 between the banks of the eastern and western Mediterranean and underlines the unexpected  
56 technological connections and the remarkable cultural homogeneity of *H. sapiens* societies when  
57 they colonized Europe, which now seems likely to indicate the existence of three distinct waves of  
58 migration into the continent. I therefore hypothesize here that all of the first Upper Paleolithic  
59 industries recognized in the Ksar Akil sequence of coastal Lebanon have precise technical and  
60 chronological counterparts in Western Europe. I also posit that the almost unanimously hailed  
61 correlation that the Northern Early Ahmarian industries of Ksar Akil were a counterpart of the  
62 Protoaurignacian is false. The precise analysis of the technical successions of Ksar Akil allows us  
63 to defend a much broader position affecting the entire technical and historical structure of the first  
64 Upper Paleolithic and the articulations of a significant part of the so-called transitional industries  
65 of Western Europe.

66 The attribution of the Neronian to *H. sapiens*, its early chronology, and its insertion in the  
67 middle of the Western European Mousterian sequence raises fundamental questions about the  
68 anthropological framework that allows us to grasp such historical complexity. Among these  
69 questions immediately emerges inquiries about the origin of the Neronian. Apart from Grotte  
70 Mandrin, few other Neronian sites exist (Moula IV, Néron I, Maras, and Figuier 1 and 1'), all  
71 having small assemblages that were excavated long ago with pickaxes [7, 8], and all occurring  
72 within a restricted portion of the middle Rhône valley.

73 However, locally and diachronically, a rather remarkable technological continuity is  
74 documented in the Mandrin sequence between the Neronian and overlying Protoaurignacian, in  
75 Levels E and B1 respectively. Technologically, this process of continuity is clearly marked and  
76 could be summarized by the change from the use of hard (mineral) to softer organic percussion in  
77 the production of lithic artifacts [5-10] and from the use of a faceted striking platform to one that  
78 is straight and abraded. Thus, no other technological peculiarity makes it possible to  
79 fundamentally distinguish these two sets; they are remarkably similar in their technological

80 structures, their production objectives, specific features of the transformation of the materials  
81 involving ventral and alternating retouch created by pressure retouching into the palm, and the  
82 function of the obtained tools. The Neronian, carried by *H. sapiens*, can therefore be understood  
83 technically and historically as a Pre-Protoaurignacian or a Protoaurignacian 0. There is however  
84 no evidence for technological continuity between the underlying Rhodanian Quina Mousterian  
85 from Level F and the Neronian from Level E, the only strata where the two industries are  
86 superimposed and stratigraphic mixing can be excluded (Supplementary Note 1). This proposition  
87 questions the origins of the Neronian and Protoaurignacian, and the processes documenting the  
88 structuring of these technical traditions. While we note connections between the Neronian and the  
89 Protoaurignacian, precise modalities of such evolution remain unclear and no local origin for  
90 Neronian can be discerned from the middle Rhône valley.

91

## 92 **Rethinking of the origin of the Upper Paleolithic: a Mediterranean Odyssey**

93 The Ksar Akil sequence occupies a key position in the understanding of Paleolithic societies in  
94 the eastern Mediterranean. The site is located 10 km northeast of Beirut and overlooks the  
95 coastal plains on the foothills of Mount Lebanon. Numerous archaeological excavations have  
96 been undertaken there, revealing 22.6 m of archaeological deposit from the Middle Paleolithic to  
97 the Epipaleolithic, and the site constitutes one of the most complete records currently recognized  
98 in Eurasia regarding the transition between the MP and UP. These archaeological levels were  
99 reached during two excavation phases held in 1937-1938 and 1947-1948 led by Ewing [11, 12].  
100 Tixier's operations from 1969 to 1975 encountered only the upper part of the sequence and a few  
101 subsequent phases of the UP that are not directly relevant here [13]. The sequence has been  
102 subdivided into 36 main archaeological units; I restrict my discussion here to the 31 MP and UP  
103 archaeological units. From top to base to summit:

104 -Levels XXXVI to XXVI are from the Middle and late MP;

105 -Levels XXV to XXI involve the IUP;

106 -Levels XX and XVI relate to the initial phases of the Early Upper Paleolithic.

107 These stratigraphic successions form part of a unique context where technological and biological  
108 aspects of the origin of the UP can be concretely addressed [14, 15].

109           Connections between the European and the Mediterranean Levantine archaeological  
110 records have been considered since the early 20<sup>th</sup> century. When it was recognized that the  
111 Aurignacian represented the first European UP, the same Aurignacian was simultaneously in the  
112 Levant area [16-17], as exemplified when during a conference in London in 1969, Bordes  
113 employed the term “Aurignacian in its strict sense” for the assemblages from Ksar Akil’s levels IX  
114 and X of the 1937-38 excavations (Xc-Xia levels of the 1947-48 excavations) [13, 18]. If, in  
115 Europe, a component prior to this form of the Aurignacian was proposed in the 1960s [19-21], its  
116 many detractors questioned the very existence of such industries until the almost definitive  
117 abandonment of these ideas at the end of the 1970s [22]. This hypothesis did not gain  
118 momentum again until the turn of the 1990s [23-26]. The recognition of this Protoaurignacian and  
119 its chronological position prior to the early Aurignacian finally helped produce correlations  
120 between the eastern and western shores of the Mediterranean. These quickly became  
121 formalized, suggesting the existence of a strict technological and cultural unity between the  
122 European Protoaurignacian and the Levantine Early Ahmarian [27-32]. These correlations were  
123 again based largely on the Ksar Akil reference sequence, the only to document all phases of the  
124 first UP in the Eastern Mediterranean (Supplementary Note 2), but one excluded from the most  
125 recent series of formalized comparisons between Levantine and European UP assemblages [33-  
126 35]. These historiographic details are essential to understand the viability of these proposed  
127 connections across the Mediterranean.

128           The use of the term IUP groups together collections from varied origins recognized over a  
129 vast territory ranging from North Africa to the highlands of Central Asia, and therefore  
130 encompasses quite diverse technical realities. In this regard, it is necessary to differentiate the  
131 generic term IUP, which does not have precise techno-cultural value [36], from the IUP of Ksar  
132 Akil which refers to a very precise technical reality. And because of Ksar Akil’s place in the history  
133 of research, it should be used as a type-sequence for the determination of an IUP *stricto sensu*,  
134 as compared to a IUP *lato sensu*, a name therefore grouping together a large fraction of the first

135 UP industries of the Old World with no suggestion of a precise technical or cultural connection.

136 My use of the term IUP hereafter is *stricto sensu*, as it is documented in the Ksar Akil sequence.

137 To position Mandrin's archaeological record in the larger Eurasian context, analyses of  
138 Ewing's 1947-1948 collections at Harvard University's Peabody Museum of Archaeology and  
139 Ethnology were undertaken from 2016 to 2019. The stratigraphic subdivisions of this specific  
140 collection are notably more precise than from the 1937-1938 excavations (which are mainly  
141 curated by the British Museum in London), and include the full stratigraphic sequence, therefore  
142 making this collection the most important here. For example, layer IX from the 1937-1938  
143 excavation, nearly 2 meters thick, was subdivided into 6 subunits (a-f) during the 1947-1948,  
144 detailing technological changes recorded between each archaeological unit. Although not  
145 corresponding to current standards, great attention was nevertheless paid regarding the smallest  
146 archaeological elements during excavation [37]. Compared to the 1937-1938 series which was  
147 relocated various times resulting in loss of part of the collection, Harvard's 1947-1948 collection  
148 has been much less handled [37]. Despite being the most precise stratigraphically and the most  
149 accurate regarding excavation methods, the Harvard collection has been less studied.

150 This research focused on 31 units, ranging from the MP to the first UP, levels XXXVI to  
151 XIII. A total of 17,809 lithic pieces were analyzed and integrated into a database distinguishing  
152 138 distinct technical and typological categories to account for the main specificities of these  
153 industries. These collections were also photographed, technically drawn, and functionally  
154 analyzed by Laure Metz (U. Connecticut, UMR LAMPEA). The aim of presenting the elements  
155 here is to put these data into qualitative perspective with what has been proposed regarding  
156 relations between Europe/Levant, essentially on bibliographic bases, concerning the first  
157 moments of the UP. This presentation therefore focuses primarily on layers XXV to XIII. The  
158 qualitative analysis gives a clear impression of continuity within these 13 stratigraphic units,  
159 illustrating technical evolution expressed gradually from one unit to another, as noted by Ohnuma  
160 and Bergman [38]. Based on technical systems, it thus seems impossible to distinguish a IUP unit  
161 superimposed by a completely EUP unit. However, technical peculiarities appear very clearly if  
162 we compare the XXIII-XXII units of the IUP with the XVI-XVII units of the EUP. The low artifact

163 count (n=33) and combination of typical MP and UP technologies in layer XXV suggest that it is  
164 the product of mixing during excavation.

165         The image that emerges from these quantitative analyses of Ksar Akil's technical record  
166 is that of an abrupt break between layers XXVI and XXIV, precisely between the MP and UP  
167 assemblages (Figs. 1-6). We can deduce that not only no serious mixing between stratigraphic  
168 units can be documented but also that, from the point of view of technical lithic systems, the  
169 sequence locally shows no possibilities of continuity between the MP and UP. At the same time,  
170 the technical breaks visible between the end of the MP and the beginning of the UP mean that  
171 the question of the emergence of the IUP cannot be documented from this sequence. These data  
172 suggest either that Ksar Akil presents an absence of archaeological deposit over a relatively long  
173 period of time, separating units XXVI and XXIV (the time required for the emergence of the IUP  
174 from a local technical substrate), or that the IUP was intrusive in this region [39-40]. If the Ksar  
175 Akil sequence can be considered fundamental to understanding the beginnings of the UP in  
176 Eurasia, the sequence, however, may not record all of the phases of its development. In this  
177 geographic area, sequences like Boker Tachtit may illustrate some of the first phases of this  
178 emergence. These early stages could have been structured around obtaining massive points  
179 from bipolar debitage, the technical affinities of which with the Bohunician of Central Europe have  
180 already been noted [33-35]. These data suggest the possibility of a fourth technical time, prior to  
181 the oldest phases recorded at Ksar Akil, putting into question the origin, in time and space, of the  
182 points systems at the beginning of the UP, whose source could be sought after more broadly in  
183 the geographic areas between the Mediterranean Levant and Central Asia [36, 41]. At the same  
184 time, within the Ksar Akil type sequence, we immediately notice that the clear processes of  
185 continuity that we evoked from the IUP to the EUP are inscribed here in concrete technical and  
186 stratigraphic realities. This should make it possible to understand, with unique resolution on the  
187 scale of Eurasia, the structure of the first moments of the UP and the evolution of these technical  
188 processes over time.

189

190 **Fig. 1.** Summary of interpretations from the Ksar Akil sequence from 1947 to 2017 (11, 37, 38,  
191 52, 77-79). The columns on the right present the keys to the technical and cultural readings  
192 based on my analyses and interpretations.

193 **Fig. 2.** Sequence from Ksar Akil, 1947-1948 excavations. Representation of Levallois debitage  
194 between the Middle Paleolithic units, layers XXVII-XXVI, and the sequence of the beginnings of  
195 the Upper Paleolithic until layer XIII. Even though Levallois debitage represents more than 25% of  
196 the assemblage in the last units of the Mousterian (blue), they are virtually absent or anecdotal  
197 from the very start of the Upper Paleolithic (green). These representations illustrate a clear and  
198 abrupt rupture between the Middle and the Upper Paleolithic. Layer XXV, the first IUP unit,  
199 documents the highest proportion of these Mousterian debitage. This XXV unit is only composed  
200 of a few lithic pieces and this lithic assemblage could well be artificial and only constitute a mix of  
201 layers XXVI and XXIV.

202 **Fig. 3.** Sequence from Ksar Akil, 1947-1948 excavations. Representation of laminar blanks  
203 (blades and bladelets) and points within the Mousterian sequence (blue) and the first three  
204 phases of the Upper Paleolithic (green). Blades and points abruptly appear in the sequence with  
205 no possibility of continuity between the end of the Mousterian and the IUP.

206 **Fig. 4.** Sequence from Ksar Akil, 1947-1948 excavations, located at the Peabody Museum,  
207 Harvard. Representation of microlith products -bladelets and micropoints- in the first phases of  
208 the Upper Paleolithic, IUP (dark green), EUP I/NEA (medium green), and EUP II/SEA (light  
209 green).

210 **Fig. 5.** Sequence from Ksar Akil, 1947-1948 excavations. Representation of bipolar productions  
211 within the blade and point debitage of the IUP (dark green), the EUP I/NEA (medium green), and  
212 the EUP II/SEA (layer XIII, 0%).

213 **Fig. 6.** Representation of backed retouched tools from Ksar Akil within the typological corpus in  
214 the IUP (dark green), EUP I/NEA (medium green), and EUP II/SEA (layer XIII, 0%). (a) 1937-  
215 1938 excavations (British Museum, Ohnuma 1988). (b) 1947-1948 excavations.



216

217 **Back to Mandrin**

218 Analysis of the Ksar Akil industries from Father Ewing's excavations allows us to recognize the  
219 existence of three distinct phases at the turn of the UP. This phasing only partially overlaps with  
220 previously proposed frameworks, particularly concerning the last moments of the Northern Early  
221 Ahmarian (NEA) and its relationship with the overlying industries. In any case, three significant  
222 phases can be clearly distinguished, beyond the processes of continuity in the structure of the  
223 technical systems that can be highlighted from layers XXV to XIII at Ksar Akil (Supplementary  
224 Note 4);

- 225 - a first phase, of unipolar Levallois points (IUP; Fig. 7);
- 226 - a second phase, of backed points mainly from bipolar laminar debitage (EUP/ NEA);
- 227 - a third phase, of rectilinear acute bladelets issued from unipolar convergent debitage  
228 (layers XIII and above).

229 Unanimously used for close to 20 years, the correlation between this second phase of Ksar Akil's  
230 Early Ahmarian and the Protoaurignacian [28, 32, 42-46] must be abandoned definitively. These  
231 systems do not overlap technologically, technically, nor typologically.

232

233 **Fig. 7.** Sequence from Ksar Akil, 1947-1948 excavations, located at the Peabody Museum,  
234 Harvard. Points and blades from the Initial Upper Paleolithic of Ksar Akil, layers XXV-XXII.  
235 Drawings by L. Metz.

236

237 Clear East/West correlations can however be established between the Levant and  
238 Western Europe. In this correlation, an equivalent of the Protoaurignacian can easily be  
239 recognized in the layer XIII industries. This proposal here is close to the conclusions of Kadowaki  
240 *et al.* [47], but they proposed correlations with Ksar Akil layers IX-XI and then with more recent  
241 units from the Ksar Akil sequence. They also proposed that the Southern Early Ahmarian (SEA)  
242 was more recent than the NEA, the two having no stratigraphic overlay, and that the  
243 Protoaurignacian chronologically preceded the SEA. I propose here that, from the point of view of

244 the general technical structure of these industries, these layers IX-XI do not represent the oldest  
245 industries of Ksar Akil that are technically comparable to the Protoaurignacian, which I place as  
246 early as layer XIII (Supplementary Notes 2 & 4).

247 Here I propose that prior to phase 3/SEA/Protoaurignacian of this chrono-cultural  
248 breakdown of Ksar Akil, the two other technical phases of this sequence also have direct parallels  
249 in the European records. The Neronian, entirely based on the production of unipolar convergent  
250 points and micropoints, technically represents a perfect replica of the Levantine phase 1/IUP. The  
251 technical systems, the production objectives, the morphology, and even the morphometry of the  
252 sought-after points are strictly identical [1, 5, 6]. In parallel, the function of the points, determined  
253 in functional analysis by Laure Metz, shows that the points of Ksar Akil XXV-XX and those of  
254 Mandrin E fall strictly within the same functional categories [48-49]. In both cases, they are mainly  
255 projectile points used with mechanical propulsions -spearthrower and/or bow. Morphometric  
256 width/thickness analysis shows that no differentiation can be made between Neronian and IUP  
257 points (Fig. 8). No distinction can be made here between these technical systems, even though  
258 they are located at opposite ends of the Mediterranean. We have also seen that, although  
259 radiometric approaches in the Levant still provide disputable results, there is every reason to  
260 believe that the beginnings of the Levantine IUP are contemporary with the Neronian of Mandrin.  
261 We also know that the Neronian was created by *H. sapiens* populations who were exotic to this  
262 region and who settled for some time in Neandertal territory [1]. All these data allow us to deduce  
263 that the two cultural groups, the Levantine IUP *stricto sensu* (as recognized in Ksar Akil) and the  
264 Neronian, actually are one. The question of the chronology of Ksar Akil's IUP has produced  
265 clearly divergent models, but the data here would be compatible with the model proposed by  
266 Bosch [50, 51] who concluded that the ages obtained from the IUP represent minimum ages  
267 (Supplementary Note 3). Although the actual age of the beginnings of the IUP at Ksar Akil is still  
268 unknown, Bosch dated layer XXII to >46 ka and the IUP begins appearing in layer XXV, thus  
269 substantially older than 46 ka. If we widen the focus to other types of evidence, the presence of  
270 shells for example, numerous at Ksar Akil, but absent in Mandrin E, does not allow us to  
271 individualize the Neronian from the IUP, seeing that the shells of mollusks in the IUP, pierced or

272 not, are almost exclusively recognized at coastal sites [52, 53]. The transformation of bones or  
273 teeth to produce objects of symbolic value is also well attested in the Neronian [1]. The evidence  
274 of a *H. sapiens* tooth in the Neronian also supports the correlations between the Neronian and  
275 the IUP presented here [5, 6].

276

277 **Fig. 8.** Points, micropoints, and cores from the IUP of Ksar Akil and from the Neronian of Mandrin  
278 E. The technical systems and the production objectives are strictly identical. The TCSA (width  
279 and thickness ratios) relate to measurements per mm and show no statistical difference.

280 Drawings by L. Metz and L. Slimak.

281

282 Recorded in Western European sequences, we then have phases I and III, from layers  
283 XXV to XX, then XIII (or even XV/XIV) to XI respectively, of Ksar Akil. The two highlights of the  
284 early Levantine UP thus find a direct and very precise echo in Western Europe through the  
285 Neronian and then the Protoaurignacian. What about Ksar Akil's second phase from layers XIX to  
286 XVI? Would there not exist, in Western Europe, an initial phase of the UP organized around the  
287 debitage of small blades obtained by essentially bipolar debitage and turned toward obtaining  
288 backed points? The debate on the origin of the Châtelperronian and its technical relations with  
289 preceding and succeeding industries began with Breuil [54] and continued throughout the 20<sup>th</sup>  
290 century [20, 55-58]. Today, it opposes two schools of thought that either consider the  
291 Châtelperronian as a full UP that has no real roots in the local industries of the Mousterian [59-  
292 64], or as a local product resulting from the evolution of preceding local Mousterian [46, 65-68]. In  
293 this debate, the question of backed points occupies a central place, as does the supposed  
294 absence of backed points or pointed blades in Mousterian collections located outside the range of  
295 the Châtelperronian and other early UP complexes [68; Supplementary Note 7). On this issue,  
296 the demonstration can be considered particularly fragile since it focuses for the Mousterian on  
297 "elongated backed blanks/points," a category which, through the approach of those authors,  
298 technically encompasses any morphologically slender support and not specifically products  
299 resulting from blade debitage *sensu stricto*. Nor do the authors typologically associate these

300 blanks to any shape of back- backed, cortical, *débordant*- in order to balance this assembly of  
301 technically and typologically distinct characters (natural, cortical, and backed backs) with  
302 Châtelperronian points. However, Châtelperronian points are well-circumscribed blanks as to  
303 their technical and typological nature which only very partially overlap this definition. The  
304 Châtelperronian point concerns true blades- technically exclusively obtained from blade  
305 debitage- and then sharpened with various forms of abrupt retouching, or even true truncations.  
306 This point alone highlights the fact that these comparisons between Châtelperronian and local  
307 industries in the Mousterian are largely based on aspects which remain rather superficial, from  
308 the point of view of the technical systems involved, mainly based on morphological properties and  
309 not on the precise technical structures present (Supplementary Note 7). Meanwhile, true backed  
310 points represent precisely one of the structural elements of NEA technical systems. More  
311 precisely, if one is technically and typologically rigorous on the definition of the backed point  
312 therefore concerning, like in the Châtelperronian, exclusively true blades associated with backed  
313 backs, these technically well-circumscribed products do not structure, on the scale of Western  
314 Eurasia, any other industry than the NEA, which has until now been completely interpreted as  
315 one of the Levantine counterparts to the Protoaurignacian. Analysis of the Ksar Akil sets shows a  
316 significant number of points that are technically and typologically undistinguishable from those of  
317 Châtelperron. The craftsman of these backed point industries, *H. sapiens*, was found in layers  
318 XVI/XVIII of Ksar Akil (Supplementary Note 3). It is remarkable that these sets were classified as  
319 early as 1947 by Father Ewing as Châtelperronian, a classification which disappears in later  
320 studies. They are stratigraphically positioned between the IUP- technically similar to the  
321 Neronian, and the XIV-XI assemblages- technically similar to the Protoaurignacian. Identifying the  
322 hominin makers of the Châtelperronian remains uncertain as it is still reliant on data from older  
323 excavations plagued by stratigraphic uncertainties (e.g., Arcy sur Cure). *H. sapiens* are  
324 biologically recognized in the Neronian/ IUP of Mandrin E [1], in the EUP of Ksar Akil [11, 15], and  
325 at Bacho Kiro [69], and in the European Protoaurignacian [70, 71]. We can therefore highlight that  
326 the three key phases of the first UP of Ksar Akil have clear parallels in contemporary industries in  
327 Western Europe, recognized from the Rhône Valley to Franco-Cantabria.

328           These elements make it possible to posit an original thesis on the origin, structure, and  
329 evolution of the first moments of the UP in Europe where we would see recorded horizontally  
330 (geographically) in space, what is recorded vertically (stratigraphically) at Ksar Akil. The state of  
331 the archaeological documentation does not make it possible to link, from one person to another,  
332 Levantine and European spaces that would appear to be isolated in terms of the content of their  
333 records. This state of affairs affects the three major phases of the division that I propose of this  
334 first UP, even if ensembles such as Bacho Kiro or Temnata could be interpreted as intermediate  
335 points between East and West [31, 44]. In the model proposed here, the elements of the  
336 Bachokirian would not correspond precisely to the Levantine IUP as recently proposed [69], but  
337 rather to one of the initial phases of the EUP, and thus to the beginning of the NEA, prior to the  
338 full development of the backed points, whereas the Châtelperronian would correspond to a more  
339 evolved stratum, therefore more recent, of this same phase of the EUP (Supplementary Notes 2  
340 & 6). The equivalent of phases I and II of Ksar Akil, which correspond to the IUP and the full  
341 development of the EUP, would thus only be currently documented at the western extremity of  
342 Europe, on the Mediterranean and Atlantic façades of France and the Iberian Peninsula. One  
343 should note the absence of data on the first UP coming from the Turkish peninsula outside its  
344 Levantine comma of Hatay, an absence that is directly incumbent on the history of research in  
345 this geographic space [72]. The significance of lack of data in this key area have long been  
346 recognized, as have the implications on Mediterranean correlations which have hitherto been  
347 limited to the Protoaurignacian and Early Aurignacian [29]. The northern Mediterranean does not  
348 document the three articulations that we see at the eastern and western ends, suggesting the  
349 existence of maritime routes linking the two sides starting at least 55 ka. Although direct evidence  
350 of long-distance maritime navigation capacities are not clearly demonstrated in the Mediterranean  
351 until after the Last Glacial Maximum [73], they are now little-questioned at the opposite eastern  
352 end of Eurasia during the peopling of Sahul starting 65 ka [74, 75].

353           The sequence of Ksar Akil allows us to document the precise technical emergence of  
354 industries identical to the Protoaurignacian of Europe (SEA), a development that can be broken  
355 down into three successive technical stages resulting from a progressive evolution of the

356 technical systems of the first Levantine UP; IUP/ NEA/ SEA. These successions in the  
357 stratigraphy have remarkable parallels with the western end of Europe with the Neronian/  
358 Châtelperronian/ Protoaurignacian triptych. Across western Europe, from France to Iberia, we  
359 would then have a technical and cultural structure identical to that recognized in stratigraphic  
360 successions, through time, in the Eastern Mediterranean. Radiometric analyses show an  
361 indisputable chronological anteriority of the Neronian over the Châtelperronian [1], and one can  
362 also therefore reasonably posit the chronological anteriority of the first phases of the  
363 Châtelperronian over the Protoaurignacian.

364 To resume, based on the analysis of the technical structures of the Ksar Akil sequence, I  
365 propose that the three phases of the first Levantine Upper Paleolithic find a strict corollary across  
366 Europe:

367 -Phase I, corresponding to the IUP, with points and blades, potentially begins in the middle of the  
368 50th millennium and is recognized in only a few sequences in Europe, including the Neronian, the  
369 Bohunician and the Kremenician, across discontinuous spaces from the Rhône valley to Ukraine.  
370 The IUP *sensu stricto*, with points and micropoints and unipolar debitage, as documented in the  
371 Ksar Akil sequence (XXV-XXII), is only documented in Rhône area with the Neronian. A variant of  
372 this IUP, *sensu lato*, with large points and bipolar debitage is well attested in the base levels of  
373 Boker Tachtit; their links with the Bohunician have precisely been approached by Tostevin. It is  
374 not possible at this time to define whether we are confronted here with a synchronic cultural  
375 diversity or with two evolutionary stages of this IUP.

376 -Phase II, corresponding to EUP I / NEA, is characterized by its production of small bipolar blades  
377 and backed points. The NEA finds singular technical correspondence with Châtelperronian  
378 productions. Its geographic distribution is clearly different from Phase I and now affects the  
379 French Iberian and Atlantic areas. The Bachokirian, weakly bipolar and not characterized either  
380 by the representation of points *sensu* Levallois, nor by backed points, could correspond to the  
381 first stages of the NEA as documented at Ksar Akil (XIX-XX); it would then be slightly earlier than  
382 the Châtelperronian in the west of the continent, before full developmental phases of the backed  
383 point at Ksar Akil (XVII-XVI).

384 -Phase III, EUP II/SEA/Protoaurignacian, focuses on the production of long rectilinear bladelets  
385 obtained by unipolar debitage. These industries are recognizable in all regions from western  
386 Europe to the Levant, uniting for the first time all Western Eurasia.

387 These three phases from the beginning of the Upper Paleolithic can be interpreted as three  
388 distinct migratory waves of biologically modern populations that systematically had their origin  
389 within the Mediterranean Levant, where different sequences make it possible to document the  
390 gradual emergence of phases II and III from the local cultural substrate.

391

392 **From colonization to relations with the Neandertals, what distribution models for the first**  
393 ***H. sapiens* in Europe?**

394 If in the Levantine space the emergence of the SEA/ Protoaurignacian makes it possible to  
395 recognize its emergence in three clear stages, this entity is structured based on a gradation of  
396 technical systems originally focused on obtaining slender Levallois points from unipolar  
397 debitage. Here we have indications of continuities in traditions, and probably also of biological  
398 populations in the broad sense. It does not seem possible to document such continuity in the  
399 Western European area. We do not recognize any sequences that allow us to perceive a  
400 progressive evolution from the Neronian to the Châtelperronian then to the Protoaurignacian. We  
401 do not know of any other collections that could be considered to present intermediate technical  
402 indicators between these three industries. At the same time, we note that these industries differ  
403 not only in time, with the Neronian/ Châtelperronian / Protoaurignacian successions, but also in  
404 their spatial distributions; Middle Rhône / Atlantic France-Iberia / Western Europe (Fig. 9). This  
405 spatio-temporal succession shows geographic distributions that are both disjointed and  
406 increasingly vast. And for the first time, the third phase, the Protoaurignacian, culturally unites the  
407 western European space and the Mediterranean Levant.

408

409 **Fig. 9.** Based on the analysis of the technical structures of the Ksar Akil sequence, I propose that  
410 the three phases of the first Levantine Upper Paleolithic find strict corollaries across Europe.

411

412           Here, these temporal and spatial peculiarities have every reason to be interpreted as the  
413 archaeological signature of three distinct migratory phases, all likely stemming from the same  
414 Levantine cultural substrate. The first migratory phase is relatively old, prior to 54 ka, and is  
415 currently recognized only in the Rhône valley. It can be noted that the Rhône is the main natural  
416 artery connecting the Mediterranean area with the great steppes of northern Europe. If we start  
417 from the observation that the IUP groups are familiar with Mediterranean maritime areas, as  
418 evidenced from the distribution of Levantine sites, we can also note that this first migratory phase  
419 does not seem to move away from the Mediterranean shores for more than a hundred kilometers.  
420 At the same time, the records from Grotte Mandrin allow us to document a continuous presence  
421 of these populations for around forty years in this territory [4]; the equivalent of a human  
422 generation or two and no more. This first migratory phase apparently abandoned this territory  
423 without leaving behind discernible biological or cultural descendants. Whatever the reason for the  
424 abandonment, we can decipher important elements about this group's structure and goals. These  
425 *H. sapiens* were probably not a simple group of scouts, but rather that their displacement had an  
426 underlying desire to permanently settle in these lands. The length of time that the group occupied  
427 this territory does not agree with a simple stop, nor with the simple desire to explore an unknown  
428 territory. The Neronian level of Mandrin yielded a tooth of a very young *H. sapiens* child [1]. This  
429 group was therefore made up of men, women, and young children, whether they were part of the  
430 trip or were conceived within these new territories. The mastery of the two banks of the river and  
431 the knowledge of all the siliceous resources over a relatively large area allow us to envisage  
432 close relations either with Neanderthal aboriginal groups, or with isolated Neanderthal individuals  
433 possessing prior knowledge of these territories [7].

434           The Châtelperronian would then correspond to a second migratory phase, which is only  
435 archaeologically visible several millennia later, around 45 ka. The data from Cova Foradada show  
436 that this second phase does not concern the French Atlantic area and the Cantabrian cornice  
437 alone [76] but was also expressed as far as the Iberian Mediterranean area, far away from the  
438 distribution territories of any Mousterian or Acheulean Tradition which has been sometimes  
439 considered as a local antecedent to these industries [46, 65, 67, 68]. If the Châtelperronian



440 effectively corresponds to a second migratory phase by *H. sapiens*, and originated from the same  
441 Levantine cultural substrate, the absence of chronological and geographical overlap between  
442 phase I (IUP / Neronian) and phase II (NEA / Châtelperronian) is all the more remarkable, as the  
443 territorial expansion of this phase II affected large territories- Atlantic, continental, and  
444 Mediterranean- which remain quite geographically disjointed. Over this same period, the Rhône  
445 valley was occupied by Neandertal groups that carried the Post-Neronian II traditions [1]. Could it  
446 be that in the same geographical space that saw the first migrations of *H. sapiens* into Europe,  
447 Neanderthal groups no longer allowed access to their previous territory? This would be  
448 remarkable, since the Post-Neronian I and Post-Neronian II, which mark a return of Neandertal  
449 populations to a large territory around Mandrin, also indicate a persistence of Neandertal  
450 populations in one of the main migratory arteries of Western Europe [1]. This could well indicate a  
451 refusal or a resistance from the aboriginal populations against a return of *H. sapiens* at the very  
452 moment when, according to this hypothesis, these latter populations would manifest their first real  
453 colonization by way of settlements, not only numerous, but also over vast territories across  
454 Western Europe.

455         The Protoaurignacian, the third phase, nonetheless remains the first real layer of *H.*  
456 *sapiens* populations to be expressed over all of Europe and as far as the Mediterranean Levant,  
457 marking the cultural and territorial unification of these groups across the continent. It is only in this  
458 phase III that the native Neanderthal populations were replaced by *H. sapiens* populations. This  
459 replacement process was expressed not only over a few generations but on a Western European  
460 scale and even at very geographically specific areas, such as the Rhône valley, for over at least  
461 12 millennia.

462         The comparative analysis of this trans-Mediterranean documentation suggests processes  
463 that are not only long, but also non-linear. This includes records of successive phases of  
464 contacts, and of cultural replacements in well-defined territories. In the Rhône Valley, these  
465 contact / replacement / exclusion processes are expressed precisely in 4 biological stages and 5  
466 cultural stages (from oldest to youngest); Rhodanian Quina (Neanderthals) / Neronian (*H.*  
467 *sapiens*) / Post-Neronian I (Neanderthals) / Post-Neronian II (Neanderthals) / Protoaurignacian

468 (*H. sapiens*) [1]. We know from the soot analysis [4] that in the two instances where *H. sapiens*  
469 are present at Grotte Mandrin, the time between the Neanderthal installations and the *H. sapiens*'  
470 is only a few seasons, possibly only one year. In the phases directly preceding the *H. sapiens*  
471 installations, by seeing the extent of the perceptible territories of these groups and of the  
472 recurrences of seasonal Neanderthal installations in the cavity over several decades, we can  
473 here parsimoniously ask if, in this very particular place of the middle Rhône valley, in this very  
474 cave, or in its immediate surroundings, these unique archaeological records imply the existence  
475 of direct contact between populations. With the probability that the migrant populations benefited  
476 from the knowledge of the aboriginal populations, we can perceive the most direct implications  
477 within the *H. sapiens* groups, allowing a precise knowledge of the resources from this rather vast  
478 territory [1]. The precise nature of these transmission processes from Neanderthals to *H. sapiens*  
479 is not directly perceptible. The possibility of Neanderthal guides integrated within the *H. sapiens*  
480 group could be seen as both minimal interpretation and universally documented in ethnography.

481         There remains the enigma of the middle valley of the Rhône, not only having recorded  
482 the first migration of *H. sapiens* into Europe, 10 to 12 millennia prior to the first migrations hitherto  
483 recognized, but also the only occurrence of successive biological replacements in Eurasia-  
484 Neanderthal / *H. sapiens* / Neanderthal / *H. sapiens*. The structure of these replacements and the  
485 first arrival of *H. sapiens* in the heart of mainland Europe's main north-south river artery can  
486 hardly be considered anecdotal. The similarity with the Levantine productions suggests the  
487 existence of maritime movement networks which would have already been solidly in place from  
488 54 ka. The absence of the second migratory phase, NEA/Châtelperronian, from the Rhône area  
489 and being framing by the southwest, the west and the north would be equally remarkable, the  
490 territories that were occupied again by Neanderthal populations were no longer appearing  
491 accessible to the *H. sapiens* populations.

492         This pattern of colonization in Europe and replacement of local populations accounts for  
493 an important part of the cultural facts recorded in Western Europe during this 10 ka period. Along  
494 with the Uluzzian in the western Mediterranean [70], the presence of *H. sapiens* groups with  
495 clearly distinct traditions underlines the cultural richness of these population replacement

496 processes. This would also indicate that, whatever the relations between *H. sapiens* and  
497 Neanderthals in phase II, as soon as 45 ka Western Europe would already have been largely  
498 occupied by different *H. sapiens* populations. At the same time, these data indicate that the last  
499 Neanderthal populations do not appear to retreat into refuge spaces, but actually occupy without  
500 sharing for a few millennia, major axes of circulation on the scale of the European continent. The  
501 technical structures of these societies do not allow us to document any obvious form of  
502 acculturation from *H. sapiens* to Neanderthals, except perhaps the precise knowledge of certain  
503 technical know-how related to point production technologies [7], which could well have been  
504 acquired by the aboriginal groups during the very first migratory phase of *H. sapiens*. The last  
505 Neanderthal populations would then not only be bearers of their technical traditions, relatively  
506 immutable over hundreds of millennia, but would also, paradoxically, be the only heirs of technical  
507 traditions long abandoned by *H. sapiens* and belonging to the first phases of settlement in Europe  
508 by these populations. It is in this light of equivocal conservatism that these final Neanderthal  
509 populations will definitively take their 'révérence', replaced in just a few seasons, as indicated by  
510 the soot records, by a wave of a population which will finally unite Europe, reaching a tipping  
511 point into the historical structures of the UP.

512

### 513 **Acknowledgments**

514 Long-term research at Grotte Mandrin was made possible support from of the Regional  
515 Archaeological Services in Lyon and many locals of Malataverne (Drôme). Analysis of Ksar Akil's  
516 collections was made possible by the staff of the Peabody Museum in Cambridge, Massachusetts  
517 (especially Jeffrey Quilter, Viva Fisher, Kara Schneiderman, Laura Costello, Diana Loren, Lainie  
518 Schultz, Emily Pierce Rose, Meredith Vasta, and Diana Zlatanovski), Christian Tryon, and  
519 support from the American School for Prehistoric Research to organize the collections, and  
520 logistical support from the InSHS of the CNRS. A Harvard University Radcliffe Institute seminar  
521 organized by Laure Metz and Christian Tryon in 2019 made it possible to present the first  
522 frameworks of these relations between East and West at the beginning of the UP. Numerous

523 exchanges with Christopher A. Bergman were crucial to understand the history of research at

524 Ksar Akil. Jason Lewis and Christian Tryon provided invaluable editorial support.

525

526

## 527 **References**

- 528 1. Slimak L, et al. Modern human incursion into Neanderthal territories 54,000 years ago at  
529 Mandrin, France. *Sci Adv.* 2022;8: eabj9496.
- 530 2. Vandeveld S, Brochier JÉ, Petit C, Slimak L. Establishment of occupation chronicles in  
531 Grotte Mandrin using sooted concretions: Rethinking the Middle to Upper Paleolithic  
532 transition. *J Hum Evol.* 2017;112: 70-78.
- 533 3. Vandeveld S, Brochier JÉ, Desachy B, Petit C, Slimak L. Sooted concretions: A new micro-  
534 chronological tool for high temporal resolution archaeology. *Quat Int.* 2018;474: 103-118.
- 535 4. Vandeveld S. Y'a pas de suie sans feu ! : étude micro-chronologique des concrétions  
536 fuligineuses : étude de cas : le site paléolithique de la Grotte Mandrin (France), Thèse de  
537 Doctorat (Université Paris I - Archéologie, 2019) 640 p.
- 538 5. Slimak L, Metz L, Teyssandier N. De la fin du Paléolithique moyen aux prémices du  
539 Paléolithique supérieur, pénombres et éclairages européens. In: Cleyet-Merle J, Shunkov  
540 MV, editors. *Le troisième homme: préhistoire de l'Altaï*. Paris, Réunion des Musées  
541 Nationaux; 2017. pp. 125-133.
- 542 6. Slimak L. For a cultural anthropology of the last Neanderthals. *Quat Sci Rev.* 2019;217: 330-  
543 339.
- 544 7. Slimak, L. Les dernières expressions du Moustérien entre Loire et Rhône, Aix-en-Provence,  
545 Thèse de Doctorat : Préhistoire (Université de Provence, 2004) 864 p.
- 546 8. Slimak L. The Neronian and the historical structure of cultural shifts from Middle to Upper  
547 Palaeolithic in Mediterranean France. *J Archaeol Sci.* 2008;35(8): 2204-2214.
- 548 9. Slimak L, Pesesse D, Giraud Y. Reconnaissance d'une installation du Protoaurignacien en  
549 vallée du Rhône : implications sur nos connaissances concernant les premiers hommes  
550 modernes en France méditerranéenne. *CR Palevol.* 2006;5: 909-917.
- 551 10. Slimak L, Plisson H. La sépulture paléolithique de l'enfant du Figuier (Ardèche, France) :  
552 emboîtement d'une symbolique funéraire. In: Bailly M, Plisson H, editors. *La valeur*  
553 *fonctionnelle des objets sépulcraux : actes de la table ronde d'Aix-en-Provence, 25-27*  
554 *octobre 2006, (Aix-en-Provence, Editions APPAM, 2008) pp. 29-38.*

- 555 11. Ewing JF. Preliminary Note on the Excavations at the Palaeolithic Site of Ksar 'Akil,  
556 Republic of Lebanon. *Antiquity*. 1947;21: 186-196.
- 557 12. Copeland L. "Preface" in *Ksar Akil, Lebanon: a technological and typological analysis of the*  
558 *later palaeolithic levels of Ksar Akil. Volume II: levels XIII-VI*, C.A. Bergman, L. Copeland,  
559 M.H. Newcomer, Eds. (British Archaeological Reports - International Series, 1987) pp. 329.
- 560 13. Tixier J, Inizan ML. "Ksar Aqil, stratigraphie et ensembles lithiques dans le Paléolithique  
561 supérieur: fouilles 1971-1975" in *Préhistoire du Levant : chronologie et organisation de*  
562 *l'espace depuis les origines jusqu'au VIe millénaire*, J. Cauvin, P. Sanlaville Eds. (Paris,  
563 Centre National de la Recherche Scientifique, 1981) pp. 353-367.
- 564 14. Douka K, et al. Chronology of Ksar Akil (Lebanon) and Implications for the Colonization of  
565 Europe by Anatomically Modern Humans. *PLOS ONE*. 2013;8: e72931.
- 566 15. Bergman CA, Stringer C. Fifty years after: Egbert, an early Upper Palaeolithic juvenile from  
567 Ksar Akil, Lebanon. *Paléorient*. 1989;15: 99-111.
- 568 16. Garrod DAE, Bates DMA, Eds., *The Stone Age of Mount Carmel. Vol. 1: Excavations at the*  
569 *Wady El-Mughara* (Oxford, Clarendon, 1937) 240 p.
- 570 17. Rust A. *Die Höhlenfunde von Jabrud (Syrien)* (Neumu□nster, Karl Wachholtz, 1950) 154 p.
- 571 18. Bergman CA, Goring-Morris N. Conference: The Levantine Aurignacian with special  
572 reference to Ksar-Akil, Lebanon. March 27-28, 1987, Institute of Archaeology, London.  
573 *Paléorient*.13/1, 142-147.
- 574 19. Laplace G. Recherches sur l'origine et l'évolution des complexes leptolithiques.  
575 *Quaternaria*. 1958;5: 153-240.
- 576 20. Laplace G. Les niveaux castelperroniens, protoaurignaciens et aurignaciens de la grotte  
577 Gatzarria à Suhare en Pays Basque. *Quartär*. 1966;17: 117-140.
- 578 21. Laplace G. Recherches sur l'origine et l'évolution des complexes leptolithiques. Rome:  
579 Ecole française de Rome/De Boccard; 1966.
- 580 22. Djindjian F. Cinquante années de recherches sur les débuts de l'Aurignacien en Europe  
581 occidentale. In Bon F, Maíllo Fernández JM, Ortega Cobos D, editors. *Autour des concepts*  
582 *de Protoaurignacien, d'Aurignacien, archaïque, initial et ancien [...] = En torno a los*

- 583            conceptos de Protoauriñaciense, Auriñaciense arcaico, inicial y antiguo [...], (Madrid,  
584            UNED, 2002) pp. 17-38.
- 585    23. Sicard S. L'Aurignacien archaïque de l'Esquicho-Grapaou : analyse typo-technologique du  
586            débitage, Mémoire de Maîtrise (Université Paris I, 1994) 123 p.
- 587    24. Sicard S. La Laouza (Gard): approche techno-fonctionnelle d'une chaîne opératoire  
588            aurignacienne, Diplôme d'Etudes approfondies (Université Paris I, 1995) 65 p.
- 589    25. Bazile & Sicard S. 1999, Le premier Aurignacien du Languedoc oriental dans son contexte  
590            méditerranéen, in: Les faciès leptolithiques du nord-ouest méditerranéen, Sacchi D. (Dir.),  
591            Paris, Société préhistorique française, 1999, p. 117-126 (Congrès préhistorique de France ;  
592            24 / Colloque international ; Carcassonne ; septembre 1994).
- 593    26. Bon F. La question de l'unité technique et économique de l'Aurignacien : réflexions sur la  
594            variabilité des industries lithiques à partir de l'étude comparée de trois sites des Pyrénées  
595            françaises (La Tuto de Camalhot, Régismont-le-Haut et Brassempouy), Université Paris I,  
596            2000, Thèse de Doctorat : Préhistoire - Ethnologie - Anthropologie 425 p.
- 597    27. Bar-Yosef O. The Upper Paleolithic Revolution. *Ann. Rev. Anthropol.* 2002;31: 363-393.
- 598    28. Mellars PA. Neanderthals and the modern human colonization of Europe. *Nature.*  
599            2004;432: 461-465.
- 600    29. Mellars PA. Archeology and the dispersal of modern humans in Europe: Deconstructing the  
601            "Aurignacian"? *Evol Anthropol.* 2006;15: 167-182.
- 602    30. Mellars PA. A new radiocarbon revolution and the dispersal of modern humans in Eurasia.  
603            *Nature.* 2006;439: 931-935.
- 604    31. Tsanova T. Les débuts du Paléolithique supérieur dans l'Est des Balkans : réflexion à partir  
605            de l'étude taphonomique et techno-économique des ensembles lithiques des sites de  
606            Bacho Kiro (couche 11), Temnata (couches VI et 4) et Kozarnika (niveau VII), Thèse de  
607            Doctorat : Préhistoire et Géologie du Quaternaire (Université de Bordeaux I, 2006) 543 p.
- 608    32. Zilhão J. Neandertals and moderns mixed, and it matters. *Evol Anthropol.* 2006;15: 183-  
609            195.



- 610 33. Tostevin GB. "The Middle Upper Paleolithic Transition from the Levant to Central Europe: in  
611 situ development or diffusion?" in Neanderthals and modern humans: discussing the  
612 transition, Central and Eastern Europe from 50,000-30,000 B.P, J. Orschiedt, G.-C.  
613 Weniger, Eds. (Mettmann, Neanderthal Museum, 2000) pp. 92-111.
- 614 34. Tostevin GB. "A quest for antecedents: a comparison of the terminal Middle Palaeolithic  
615 and early Upper Palaeolithic of the Levant" in More than Meets the Eye: Studies on the  
616 Upper Paleolithic in the Near East, N. Goring-Morris, A. Belfer-Cohen, Eds. (Oxford, Oxbow  
617 Books, 2003) pp. 54-67.
- 618 35. Tostevin GB. Seeing Lithics: A middle-range theory for testing for Cultural transmission in  
619 the Pleistocene. Oxford: Oxbow Books; 2012.
- 620 36. Kuhn SL, Zwyns N. Rethinking the initial Upper Paleolithic. *Quat. Int.* 2014;347: 29-38.
- 621 37. Williams JK, Bergman CA. Upper Paleolithic levels XIII–VI (A and B) from the 1937–1938  
622 and 1947–1948 Boston College excavations and the Levantine Aurignacian at Ksar Akil,  
623 Lebanon. *Paléorient.* 2010;36: 117–161.
- 624 38. Ohnuma K, Bergman, CA. "A technological analysis of the Upper Palaeolithic Levels  
625 (XXV–VI) of Ksar Akil, Lebanon" in *The Emergence of Modern Humans: An Archaeological  
626 Perspective*, P. Mellars, Ed. (Edinburgh University Press 1990) pp. 91–138.
- 627 39. Rose JI, Marks EA. "Out of Arabia" and the Middle-Upper Palaeolithic transition in the  
628 Southern Levant. *Quartär.* 2014;61: 49-85.
- 629 40. Marks EA, Rose JI. "Through a prism of paradigms: a century of research into the origins of  
630 the Upper Palaeolithic in the Levant" in *Modes de contacts et de déplacements au  
631 Paléolithique Eurasiatique*, M. Otte, F. Le Brun-Ricalens, Eds. (Université de Liège, 2014)  
632 pp. 63-93.
- 633 41. Yaroshevich A, Kaufman D, Marks A. Weapons in transition: Reappraisal of the origin of  
634 complex projectiles in the Levant based on the Boker Tachtit stratigraphic sequence. *J  
635 Archaeol Sci.* 2021;131: 105381.

- 636 42. Teyssandier N. Questioning the first Aurignacian: mono or multi cultural phenomenon  
637 during the formation of the Upper Paleolithic in Central Europe and the Balkans.  
638 *Anthropologie Int J Sci Man.* 2006;XLIV: 9-29.
- 639 43. Hoffecker JF. The spread of modern humans in Europe. *Proc Natl Acad Sci USA.*  
640 2009;106: 16040-16045.
- 641 44. Tsanova T et al. Le plus petit dénominateur commun : réflexion sur la variabilité des  
642 ensembles lamellaires du Paléolithique supérieur ancien d'Eurasie. Un bilan autour des  
643 exemples de Kozarnika (Est des Balkans) et Yafteh (Zagros central). *L'Anthropologie.*  
644 2012;116: 469-509.
- 645 45. Hublin JJ. The modern human colonization of western Eurasia: when and where? *Quat Sci*  
646 *Rev.* 2015;118: 194-210.
- 647 46. Roussel M, Soressi M, Hublin JJ. The Châtelperronian conundrum: Blade and bladelet lithic  
648 technologies from Quinçay, France. *J Hum Evol.* 2016;95: 13-32.
- 649 47. Kadowaki S, Omori T, Nishiaki Y. Variability in Early Ahmari lithic technology and its  
650 implications for the model of a Levantine origin of the Protoaurignacian. *J Hum Evol.*  
651 2015;82: 67-87.
- 652 48. Metz L. Néandertal en armes ? : des armes, et de l'arc, au tournant du 50ème millénaire en  
653 France méditerranéenne, Thèse de Doctorat : Préhistoire (Aix-Marseille Université, 2015)  
654 410 p.
- 655 49. Tryon CA, Metz L. Archeological evidence for human dispersals around the Mediterranean  
656 basin? *Evol Anthropol.* 2019;28: 233-235.
- 657 50. Bosch MD et al. New chronology for Ksâr 'Akil (Lebanon) supports Levantine route of  
658 modern human dispersal into Europe. *Proc Natl Acad Sci USA.* 2015;112: 7683-7688.
- 659 51. Bosch MD et al. Reply to Douka et al.: Critical evaluation of the Ksâr 'Akil chronologies.  
660 *Proc Natl Acad Sci S.A.* 2015;112: E7035.
- 661 52. Kuhn SL, Stiner MC, Reese DS. E.S. Güleç, Ornaments of the earliest Upper Paleolithic:  
662 New insights from the Levant. *Proc Natl Acad Sci USA.* 2001;98: 7641-7646.

- 663 53. Kadowaki S, Kurozumi T, Henry DO. "Marine Shells from Tor Fawaz, Southern Jordan, and  
664 Their Implications for Behavioral Changes from the Middle to Upper Palaeolithic in the  
665 Levant" in Learning Among Neanderthals and Palaeolithic Modern Humans: Archaeological  
666 Evidence, Y. Nishiaki, O. Jöris, Eds. (Singapore, Springer, 2019) pp. 161-178.
- 667 54. Breuil H. "Les gisements présolutréens du type d'Aurignac : coup d'œil sur le plus ancien  
668 âge du Renne, (Nendeln, Kraus Reprint 1969)" in Congrès international d'Anthropologie et  
669 d'Archéologie préhistoriques : compte rendu de la treizième session, Monaco 1906. Tome  
670 Ier, Monaco (Imprimerie de Monaco, 1907) pp. 323-350.
- 671 55. Breuil H. La question aurignacienne: Étude critique de stratigraphie comparée. *Rév Préhist.*  
672 1907;2: 173-219.
- 673 56. Peyrony D. Les industries « aurignaciennes » dans le bassin de la Vézère. *Bull Soc Préhist*  
674 *Française.* 1933;30: 543-559.
- 675 57. Bordes F. La question périgordienne. In : *La Préhistoire : problèmes et tendances*, Éd. du  
676 CNRS, Paris, p. 59-71 (1968).
- 677 58. Bordes F. "Du Paléolithique moyen au Paléolithique supérieur, continuité ou dis-  
678 continuité?" in *Origine de l'Homme moderne : actes du Colloque de l'UNESCO* (Paris,  
679 1972) pp. 211-218.
- 680 59. Bar-Yosef O, Bordes F. Who were the makers of the Châtelperronian culture? *J Hum Evol.*  
681 2010;59: 586-593.
- 682 60. Bachelier F. Quelle unité pour le Châtelperronien? Apport de l'analyse taphonomique et  
683 techno-économique des industries lithiques de trois gisements aquitains de plein air : Le  
684 Basté, Bidart (Pyrénées-Atlantiques) et Canaule II (Dordogne), Thèse de Doctorat :  
685 Préhistoire (Université Bordeaux I, 2011) 441 p.
- 686 61. Bordes JG, Teyssandier N. The Upper Paleolithic nature of the Châtelperronian in South-  
687 Western France: Archeostratigraphic and lithic evidence. *Quat Int.* 2011;246: 382-388.
- 688 62. Aubry T et al. Stratigraphic and technological evidence from the Middle Palaeolithic-  
689 Châtelperronian-Aurignacian record at the Bordes-Fitte rockshelter (Roches d'Abilly site,  
690 Central France). *J Hum Evol.* 2012;62: 116-137.

- 691 63. Gravina B et al. No Reliable Evidence for a Neanderthal-Châtelperronian Association at La  
692 Roche-à-Pierrot, Saint-Césaire. *Sci Rep.* 2018;8: 15134.
- 693 64. Jaubert J, Bordes JG, Discamps E, Gravina B. “A New Look at the End of the Middle  
694 Palaeolithic Sequence in Southwestern France” in *Characteristic Features of the middle to*  
695 *upper Paleolithic Transition in Eurasia: proceedings of the International Symposium (July 4-*  
696 *10, 2011, Denisova Cave, Altai), A.P. Derevianko, M.V. Shunkov, Eds. (Novosibirsk,*  
697 *Institute of Archaeology and Ethnography SB RAS, 2011) pp. 102-115.*
- 698 65. Pelegrin J. *Technologie lithique : le Châtelperronien de Roc-de-Combe (Lot) et de La Côte*  
699 *(Dordogne) (Paris, CNRS Editions, 1995) 298 p.*
- 700 66. Soressi M. *Le Moustérien de tradition acheuléenne du sud-ouest de la France. Discussion*  
701 *sur la signification du faciès à partir de l'étude comparée de quatre sites : Pech-de-l'Azé I,*  
702 *Le Moustier, La Rochette et la Grotte XVI, Thèse de Doctorat - Préhistoire et Géologie du*  
703 *Quaternaire (Université de Bordeaux I, 2002) 340 p.*
- 704 67. Roussel M. *Normes et variations de la production lithique durant le Châtelperronien : la*  
705 *séquence de la Grande-Roche-de-la-Plématrie à Quinçay (Vienne), Thèse de Doctorat,*  
706 *Préhistoire (Université Paris Ouest Nanterre - La Défense, 2011) 540 p.*
- 707 68. Ruebens K, McPherron SP, Hublin JJ. On the local Mousterian origin of the  
708 Châtelperronian: Integrating typo-technological, chronostratigraphic and contextual data. *J*  
709 *Hum Evol.* 2015;86: 55-91.
- 710 69. Hublin JJ et al. Initial Upper Palaeolithic Homo sapiens from Bacho Kiro Cave, Bulgaria.  
711 *Nature.* 2020;581: 299-302.
- 712 70. Benazzi S et al. Early dispersal of modern humans in Europe and implications for  
713 Neanderthal behaviour. *Nature.* 2011;479: 525-528.
- 714 71. Benazzi S et al. The makers of the Protoaurignacian and implications for Neandertal  
715 extinction, *Science.* 2015;348: 793-796.
- 716 72. Slimak L. Implantations humaines et exploitation des obsidiennes en Anatolie centrale  
717 durant le Pléistocène. *Paléorient.* 2004;30: 7-20.

- 718 73. Di Maida G, Mannino MA, Krause-Kyora B, Jensen TZT, Talamo S. Radiocarbon dating  
719 and isotope analysis on the purported Aurignacian skeletal remains from Fontana Nuova  
720 (Ragusa, Italy). PLoS ONE. 2019;14: e0213173.
- 721 74. O'Connell JF et al. When did *Homo sapiens* first reach Southeast Asia and Sahul? Proc  
722 Natl Acad Sci USA. 2018;115: 8482-8490.
- 723 75. Bird MI et al. Early human settlement of Sahul was not an accident. Sci Rep. 2019;9: 8220.
- 724 76. Morales Hidalgo JI et al. The Middle-to-Upper Paleolithic transition occupations from Cova  
725 Foradada (Calafell, NE Iberia). PLOS ONE. 2019;14, e0215832.
- 726 77. Azoury I. A Technological and Typological Analysis of the Transitional levels of Ksar Akil  
727 and Abu Halka, Ph.D. Dissertation (University of London 1971).
- 728 78. Besançon J, Copeland L, Hours F. Tableau de Préhistoire Libanaise. Paléorient. 1977;3: 5-  
729 45.
- 730 79. Bergman C, Williams J, Douka K, Schyle D. "The Palaeolithic Sequence of Ksar 'Akil,  
731 Lebanon" in Quaternary of the Levant: Environments, Climate Change, and Humans, Y.  
732 Enzel, O. Bar-Yosef, Eds. (Cambridge University Press, 2017) pp. 267-276.

733

### 734 **Supporting Information**

735 S1 File. Contains:

736 Supplementary Note 1. Evolving Thoughts on the Origins of the Neronian

737 Supplementary Note 2. History of Correlations between European & Levantine

738 Archaeological Sequences

739 Supplementary Note 3. Radiometric Dating of the Ksar Akil Sequence

740 Supplementary Note 4: Salient features of the Technical Structures of the IUP and EUP  
741 at Ksar Akil

742 Supplementary Note 5: After the EUP of Ksar Akil

743 Supplementary Note 6: From East and West. Back to Mandrin, downgrading,  
744 reclassification, pieces of the puzzle of Western Europe

745 Supplementary Note 7: The Châtelperronian Question

746

## Supplementary References

| Layers excav. 1937-1948 | Layers excav. 1947-1948 | Layers (ix.-ixian 1981) | Ewing 1947          | Assur 1971 1937-38 collections | Besançon et al. 1977 1937-38 collections | Ohnuma & Bergman 1990 1937-38 collections | Kahn et al. 2001       | Williams & Bergman 2010 1937-38 + 1947-48 collections | Bergman et al. 2017 1937-38 + 1947-48 collections | Categories of percussion (this study)   | Concerned technologies (this study) | Kear & J. attributions (this study) | Trans-Mediterr. correlations (this study) | Layers excav. 1947-1948     |                 |      |       |      |  |     |       |
|-------------------------|-------------------------|-------------------------|---------------------|--------------------------------|------------------------------------------|-------------------------------------------|------------------------|-------------------------------------------------------|---------------------------------------------------|-----------------------------------------|-------------------------------------|-------------------------------------|-------------------------------------------|-----------------------------|-----------------|------|-------|------|--|-----|-------|
|                         | I                       |                         |                     |                                | Classic Kebaran                          |                                           |                        |                                                       |                                                   | Organic percussion                      | Bipolar returns                     |                                     |                                           | I                           |                 |      |       |      |  |     |       |
|                         | II                      | I,2,3                   |                     |                                |                                          |                                           |                        |                                                       | Masraqan affinities                               |                                         |                                     |                                     |                                           |                             |                 |      | II    |      |  |     |       |
|                         | III                     |                         | Gravettian          |                                | Early Kebaran                            |                                           | Early Kebaran          |                                                       |                                                   |                                         |                                     |                                     |                                           |                             |                 |      |       | III  |  |     |       |
|                         | IV                      | II 4,5,6                |                     |                                |                                          |                                           |                        |                                                       | Late southern Early Ahmarian affinities           |                                         |                                     |                                     |                                           |                             |                 |      |       | IV   |  |     |       |
|                         | V                       |                         |                     |                                |                                          |                                           |                        |                                                       |                                                   |                                         |                                     |                                     |                                           |                             |                 |      |       | V    |  |     |       |
|                         | VIAB                    | III 7-8a                |                     |                                |                                          | Start Terminal UP                         |                        | Phase 7                                               | Unassigned                                        |                                         |                                     |                                     |                                           |                             |                 |      |       | VIAB |  |     |       |
|                         | VII                     |                         | Middle Aurignacian  | Levantine Aurignacian C        | Levantine Aurignacian C                  | Late Lev. Aurignacian                     |                        | Phase 6 Atlitian                                      | Atlitian                                          |                                         |                                     |                                     |                                           |                             | Unipolar strict |      |       | VII  |  |     |       |
| VI                      | IXA                     | IV 8ac-10a              |                     |                                | Levantine Aurignacian B                  | Mixed                                     |                        |                                                       | Unassigned                                        |                                         |                                     |                                     |                                           |                             |                 |      |       |      |  | IXA |       |
|                         | IXB                     | V 10bc-10d              |                     |                                | Levantine Aurignacian B                  |                                           |                        |                                                       | Phase 5 Lev Aurignacian                           |                                         |                                     |                                     |                                           | Lev. Aurign., sensu stricto |                 |      |       |      |  |     | IXB   |
|                         | IX CF                   |                         |                     |                                |                                          |                                           |                        |                                                       | Phase 4 Unnamed UP                                |                                         |                                     |                                     |                                           | Unassigned                  |                 |      |       |      |  |     | IX CF |
| VII & VIII              | XA                      | VI 10b-11c              |                     |                                |                                          |                                           | Mid Lev. Aurignacian   |                                                       | Unassigned                                        | Affinities with southern Early Ahmarian |                                     | EUP II Southern Early Ahmarian      |                                           | XA                          |                 |      |       |      |  |     |       |
|                         | XB                      |                         |                     |                                |                                          |                                           | Early Lev. Aurignacian | Phase 3 Unnamed UP                                    | Unassigned                                        |                                         |                                     |                                     |                                           | XB                          |                 |      |       |      |  |     |       |
|                         | XC                      |                         |                     | Levantine Aurignacian A        | Levantine Aurignacian A                  |                                           |                        | No artifacts                                          |                                                   |                                         |                                     |                                     |                                           | XC                          |                 |      |       |      |  |     |       |
|                         | X                       | XIA                     | VII 12              |                                |                                          |                                           |                        | Occupational hiatus                                   | Occupational hiatus                               |                                         |                                     |                                     |                                           | X                           |                 |      |       |      |  |     |       |
|                         | XI                      |                         | Châtelperronian     |                                |                                          |                                           |                        | UP II B                                               |                                                   |                                         | Unipol. returns                     |                                     |                                           | XI                          |                 |      |       |      |  |     |       |
| XI-XIII                 | XII                     |                         |                     |                                |                                          |                                           |                        |                                                       | Disturbed                                         |                                         |                                     |                                     |                                           |                             |                 |      |       |      |  | XII |       |
|                         | XIII                    |                         |                     |                                |                                          |                                           |                        |                                                       |                                                   |                                         |                                     |                                     |                                           |                             |                 |      | XIII  |      |  |     |       |
| XIV                     | XIV                     |                         |                     |                                |                                          |                                           |                        |                                                       |                                                   |                                         |                                     |                                     |                                           |                             |                 |      | XIV   |      |  |     |       |
| XV                      | XV                      |                         | Occupational hiatus |                                |                                          |                                           |                        |                                                       |                                                   |                                         | Bipolar                             |                                     |                                           | XV                          |                 |      |       |      |  |     |       |
| XVI                     | XVI                     |                         |                     |                                |                                          |                                           |                        |                                                       |                                                   |                                         |                                     |                                     |                                           |                             |                 |      | XVI   |      |  |     |       |
| XVII                    | XVII                    |                         | Transitional        | Phase B2                       |                                          | UP Phase 2                                |                        | Phase 2 Ahmarian                                      | Early Ahmarian, northern facies                   |                                         | Soft stone                          | Bipolar                             | EUP I Northern Early Ahmarian             | XVII                        |                 |      |       |      |  |     |       |
| XVIII                   | XVIII                   |                         |                     |                                |                                          |                                           |                        |                                                       |                                                   |                                         |                                     |                                     |                                           |                             |                 |      | XVIII |      |  |     |       |
| XIX                     | XX                      |                         |                     |                                |                                          |                                           |                        |                                                       |                                                   |                                         |                                     |                                     |                                           |                             |                 |      | XIX   |      |  |     |       |
| XX                      | XX                      |                         |                     |                                |                                          |                                           |                        |                                                       |                                                   |                                         |                                     |                                     |                                           |                             |                 |      | XX    |      |  |     |       |
| XXI                     | XXI                     |                         |                     | Phase B1                       |                                          |                                           |                        |                                                       |                                                   |                                         | Hard stone                          | Unipolar                            | IUP                                       | XXI                         |                 |      |       |      |  |     |       |
| XXII                    | XXII                    |                         |                     | Phase I Transitional UP        | Phase A                                  | UP Phase I                                |                        |                                                       | IUP part of Bokerian sequence of Leder 2014       |                                         |                                     |                                     |                                           |                             |                 | XXII |       |      |  |     |       |
| XXIII                   | XXIII                   |                         |                     |                                |                                          |                                           |                        |                                                       |                                                   |                                         |                                     |                                     |                                           | XXIII                       |                 |      |       |      |  |     |       |
| XXIV                    | XXIV                    |                         |                     |                                |                                          |                                           |                        |                                                       |                                                   |                                         |                                     |                                     |                                           | XXIV                        |                 |      |       |      |  |     |       |
| XXV                     | XXV                     |                         |                     |                                |                                          |                                           |                        |                                                       |                                                   |                                         |                                     |                                     |                                           | XXV                         |                 |      |       |      |  |     |       |

Potential stratigraphic linking between BP and XXXI and UP and XXXI

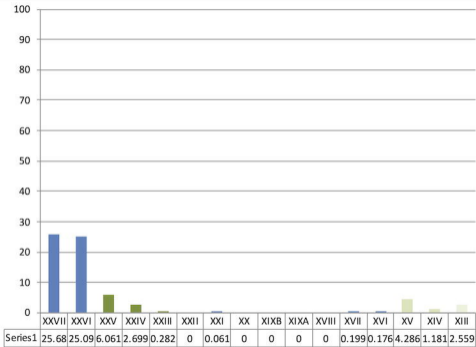



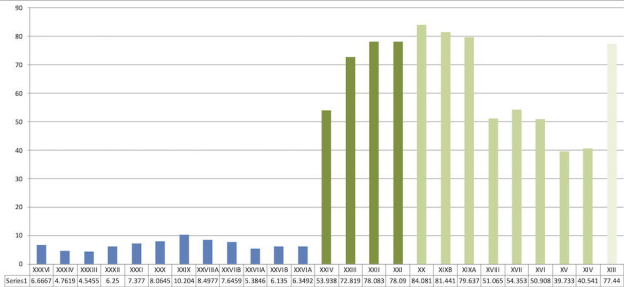

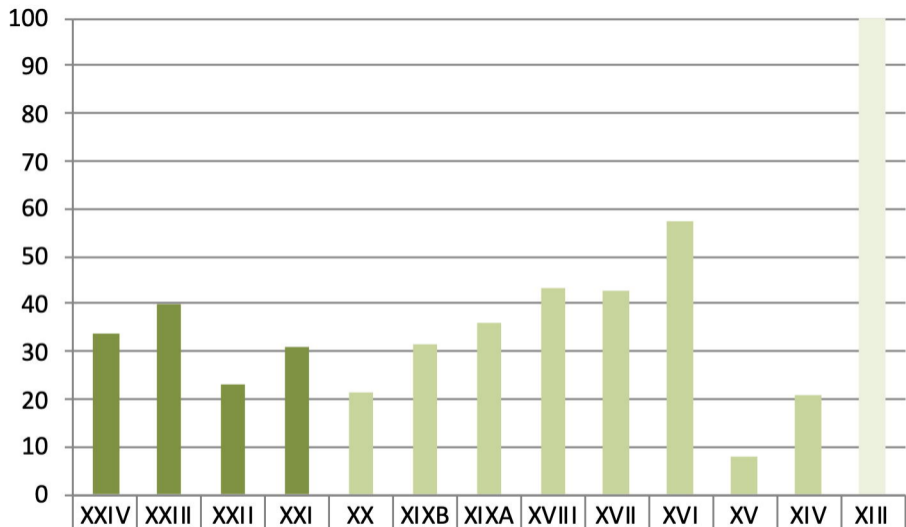

| Series1 | XXIV  | XXIII | XXII | XXI   | XX    | XIXB  | XIXA  | XVIII | XVII  | XVI   | XV    | XIV   | XIII |
|---------|-------|-------|------|-------|-------|-------|-------|-------|-------|-------|-------|-------|------|
| Series1 | 33.96 | 40    | 23.2 | 30.86 | 21.43 | 31.69 | 35.91 | 43.54 | 42.98 | 57.39 | 8.108 | 21.05 | 100  |

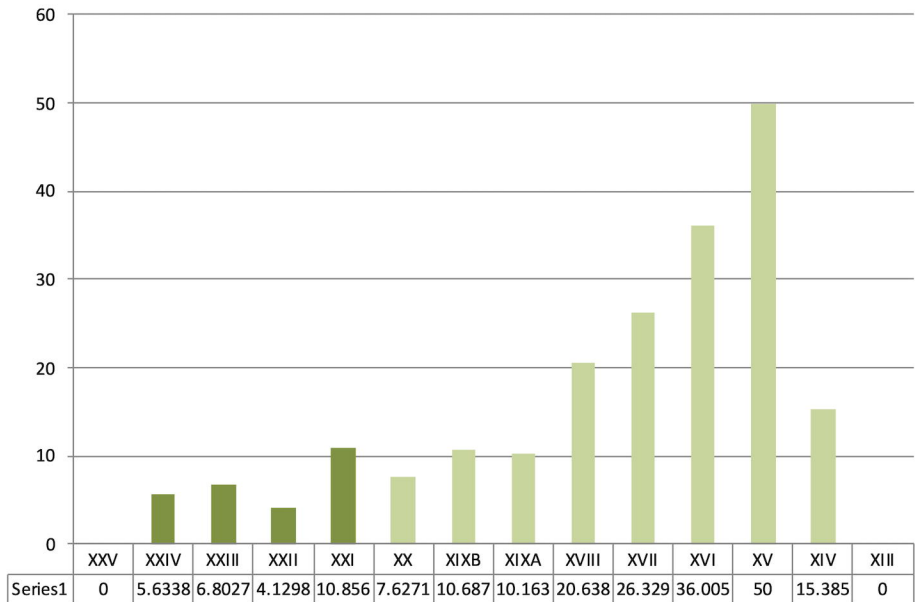

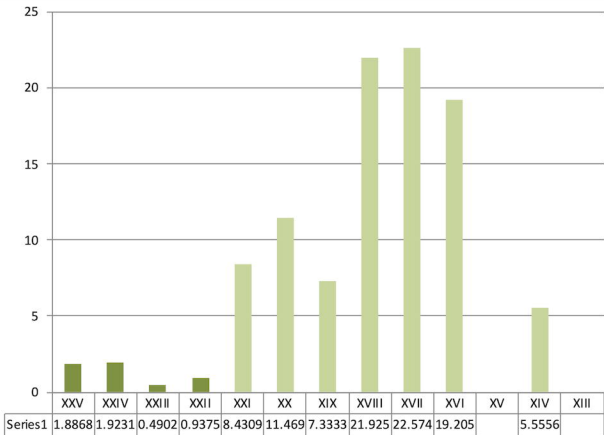

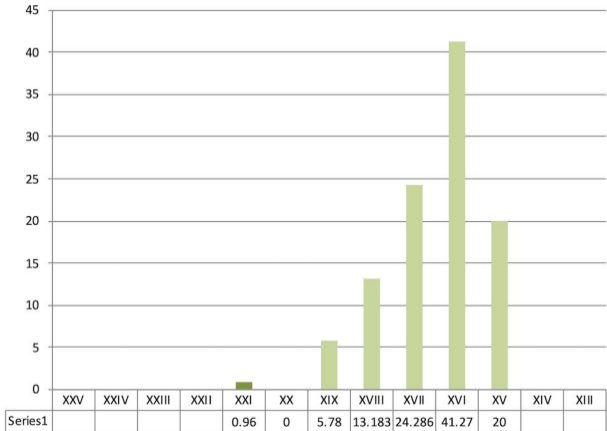

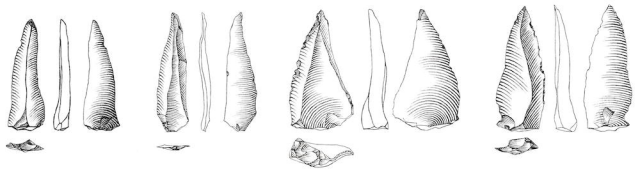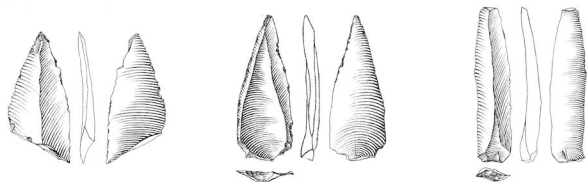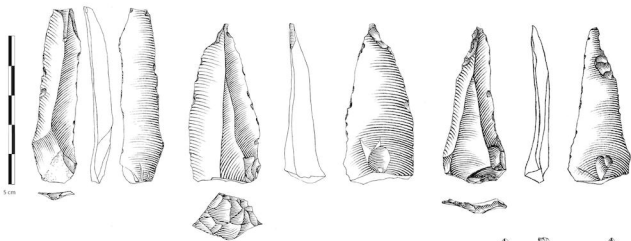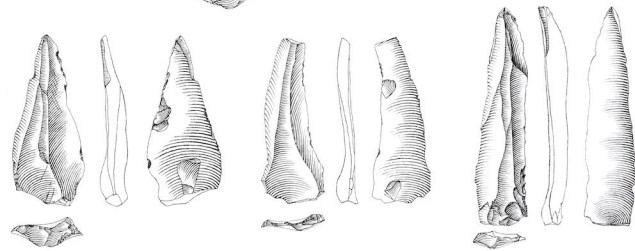

Points

Mandrin, Neronien

Ksar Akil, IUP

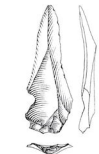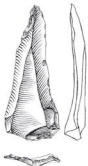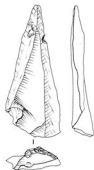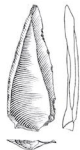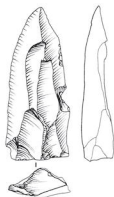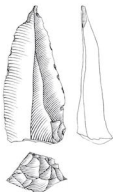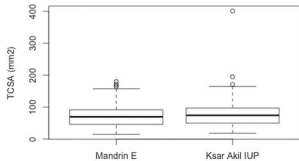

Micropoints

Mandrin, Neronien

Ksar Akil IUP

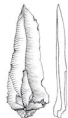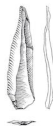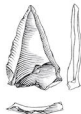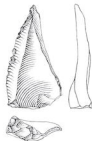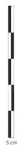

Cores

Mandrin, Neronien

Ksar Akil IUP

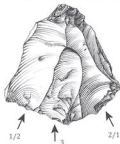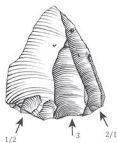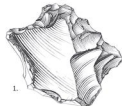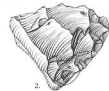

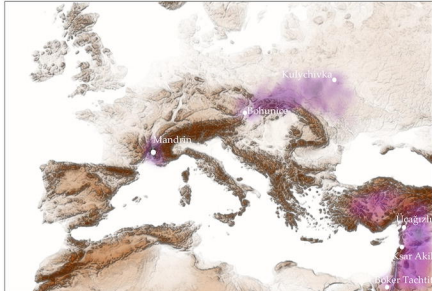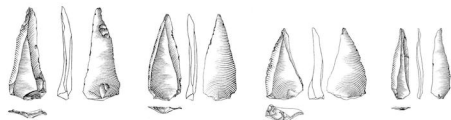

**Ksar Akil phase I. Initial Upper Paleolithic/Neronian**

Collections Ewing 1947-1948, Layers XXV-XXII

Points and micropoints. Drawings Laure Metz.

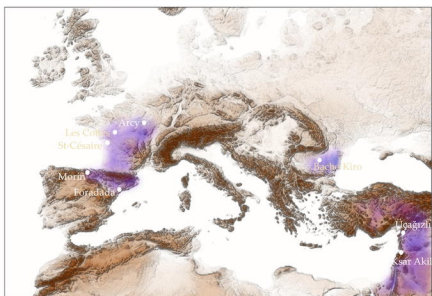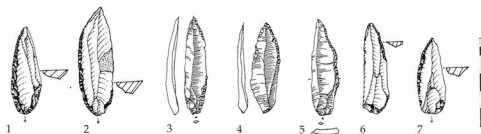

**Ksar Akil phase II. Early Upper Paleolithic I - Northern Early Ahmarian/Châtelperronian**

1-5: Ohnuma et Bergman 1990. Couches XVII et XVI. 6-7: Azouiry 1986. Couche XVI.

Backed points on bipolar little blades

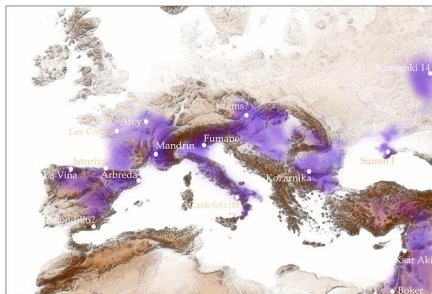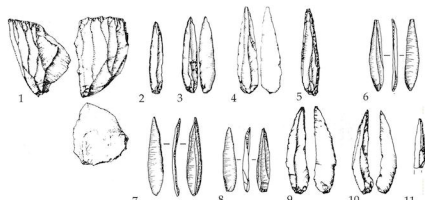

**Ksar Akil phase II. Early Upper Paleolithic II - Southern Early Ahmarian/Protoaurignacian.**

1-8: Williams et Bergman 2010. Layers XI and Xc. 9-11: Bergman 1988. Layers XIII-XI.

Rectilinear bladelets from unipolar convergent flakings retouched by altern or pointing retouches.
